# Supplementary material for: Size analysis of large DNA molecules by relaxation time measurement using a nanoslit channel
Source: Royal Society of Chemistry journal article supplement (doi:10.1039/d4lc00998c), 2025-01-01
Supplement: d4lc00998c1.pdf [file d4lc00998c1.pdf]

## Supporting Information

# Size analysis of large DNA molecules by relaxation time measurement using a nanoslit channel

Hongdong Yi<sup>1</sup>, Shintaro Itoh<sup>1,2</sup>, Kenji Fukuzawa<sup>1</sup>, Hedong Zhang<sup>3</sup>, Naoki Azuma<sup>1,4</sup>

1. Department of Micro-Nano Mechanical Science and Engineering, Nagoya University, Japan.
2. PRESTO, Japan Science and Technology Agency, Japan.
3. Department of Complex Systems Science, Nagoya University, Japan.

Corresponding author:

### Table of Contents

**Figure S1.** The intensity distribution along  $x$ -direction  $I(x)$  and fitted curve for one DNA molecule

**Figure S2.** Relaxation time histogram and Gaussian fitting results of a mixed DNA sample ( $\lambda$  DNA: T4 DNA = 1: 1) in a nanoslit channel of depth 130 (a) and 49 (c) nm. Relaxation time histogram and Gaussian fitting results of a mixed DNA sample ( $\lambda$  DNA: T4 DNA = 2: 1) in a nanoslit channel of depth 130 (b) and 49 (d) nm.  $\tau_2$  and  $\tau_1$  are the average values of the two peaks and  $\Delta\tau = \tau_2 - \tau_1$ .  $W_1$  and  $W_2$  are full widths at half the maximum values of the two peaks.

**Figure S3.** Relaxation time histogram for the number of datasets increased in order in a nanoslit with 130 nm.

**Figure S4.** Relaxation time histogram for the number of datasets increased in order in a nanoslit with 110 nm.

**Figure S5.** Relaxation time histogram for the number of datasets increased in order in a nanoslit with 69 nm.

**Figure S6.** Relaxation time histogram for the number of datasets increased in order in a nanoslit with 49 nm.

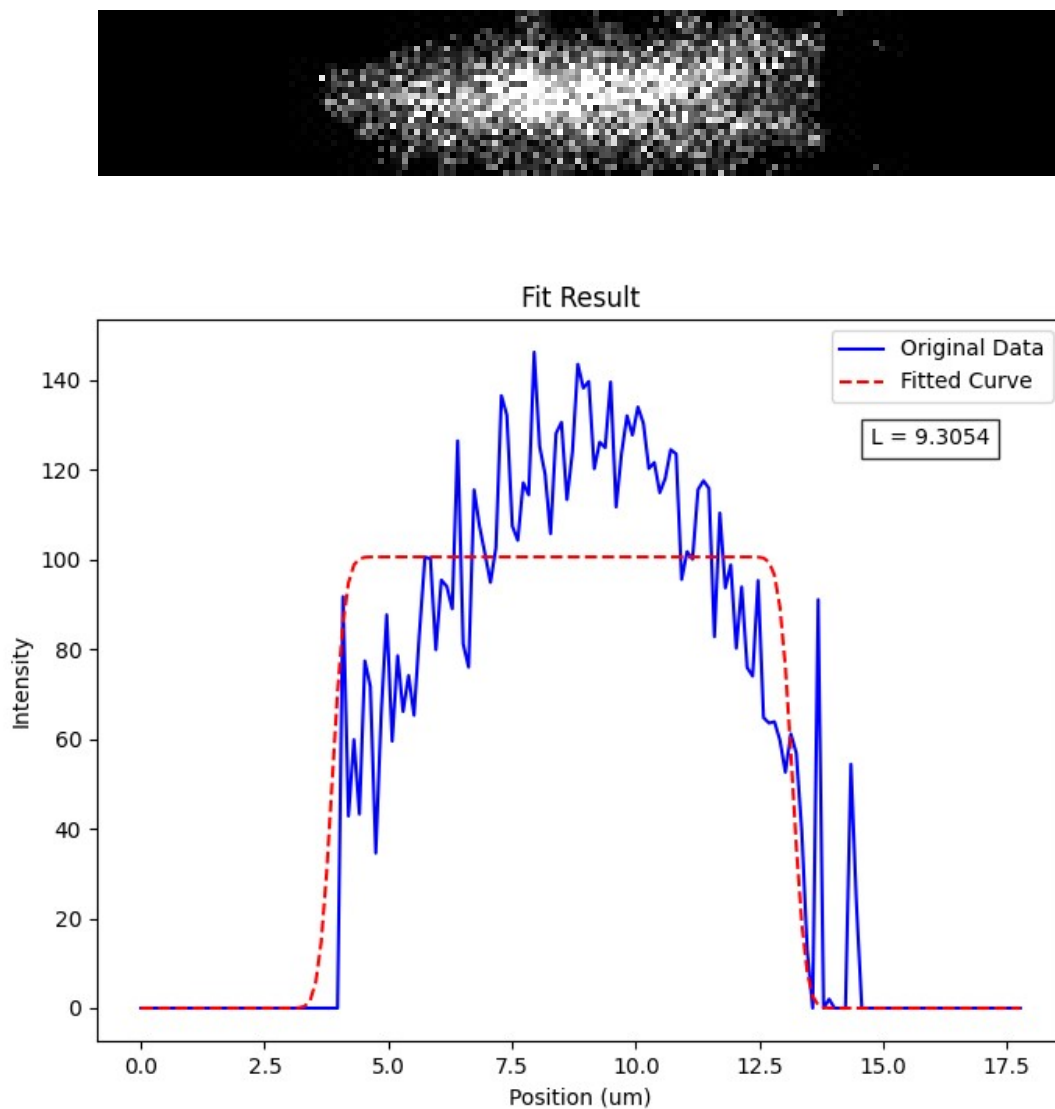

**Figure S1.** The intensity distribution along  $x$ -direction  $I(x)$  and fitted curve for one DNA molecule.

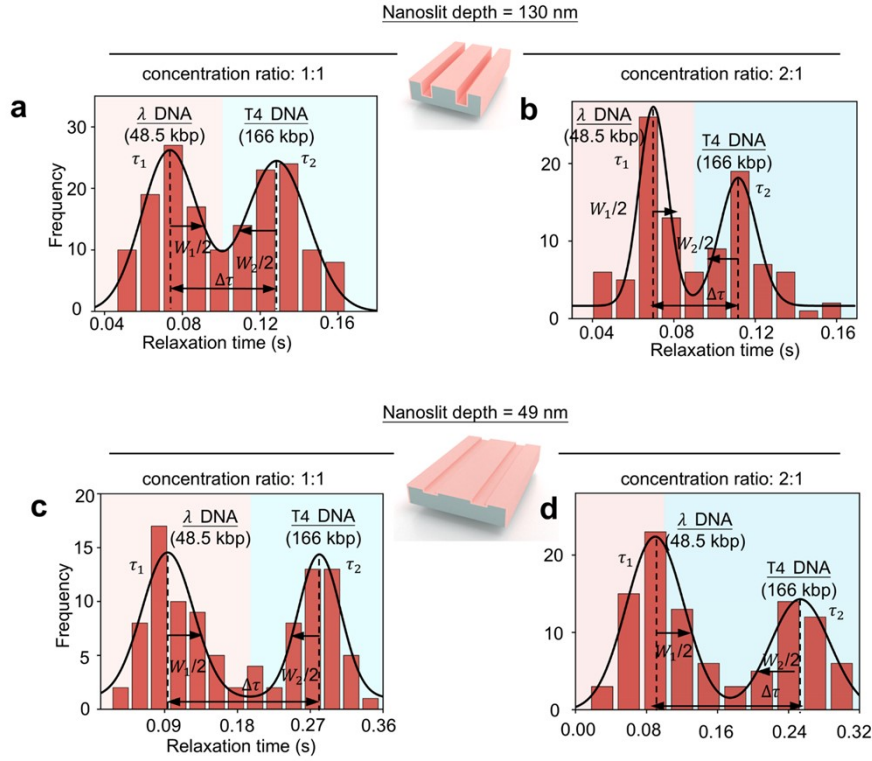

**Figure S2.** Relaxation time histogram and Gaussian fitting results of a mixed DNA sample ( $\lambda$  DNA: T4 DNA = 1: 1) in a nanoslit channel of depth 130 (a) and 49 (c) nm. Relaxation time histogram and Gaussian fitting results of a mixed DNA sample ( $\lambda$  DNA: T4 DNA = 2: 1) in a nanoslit channel of depth 130 (b) and 49 (d) nm.  $\tau_2$  and  $\tau_1$  are the average values of the two peaks and  $\Delta\tau = \tau_2 - \tau_1$ .  $W_1$  and  $W_2$  are full widths at half the maximum values of the two peaks.

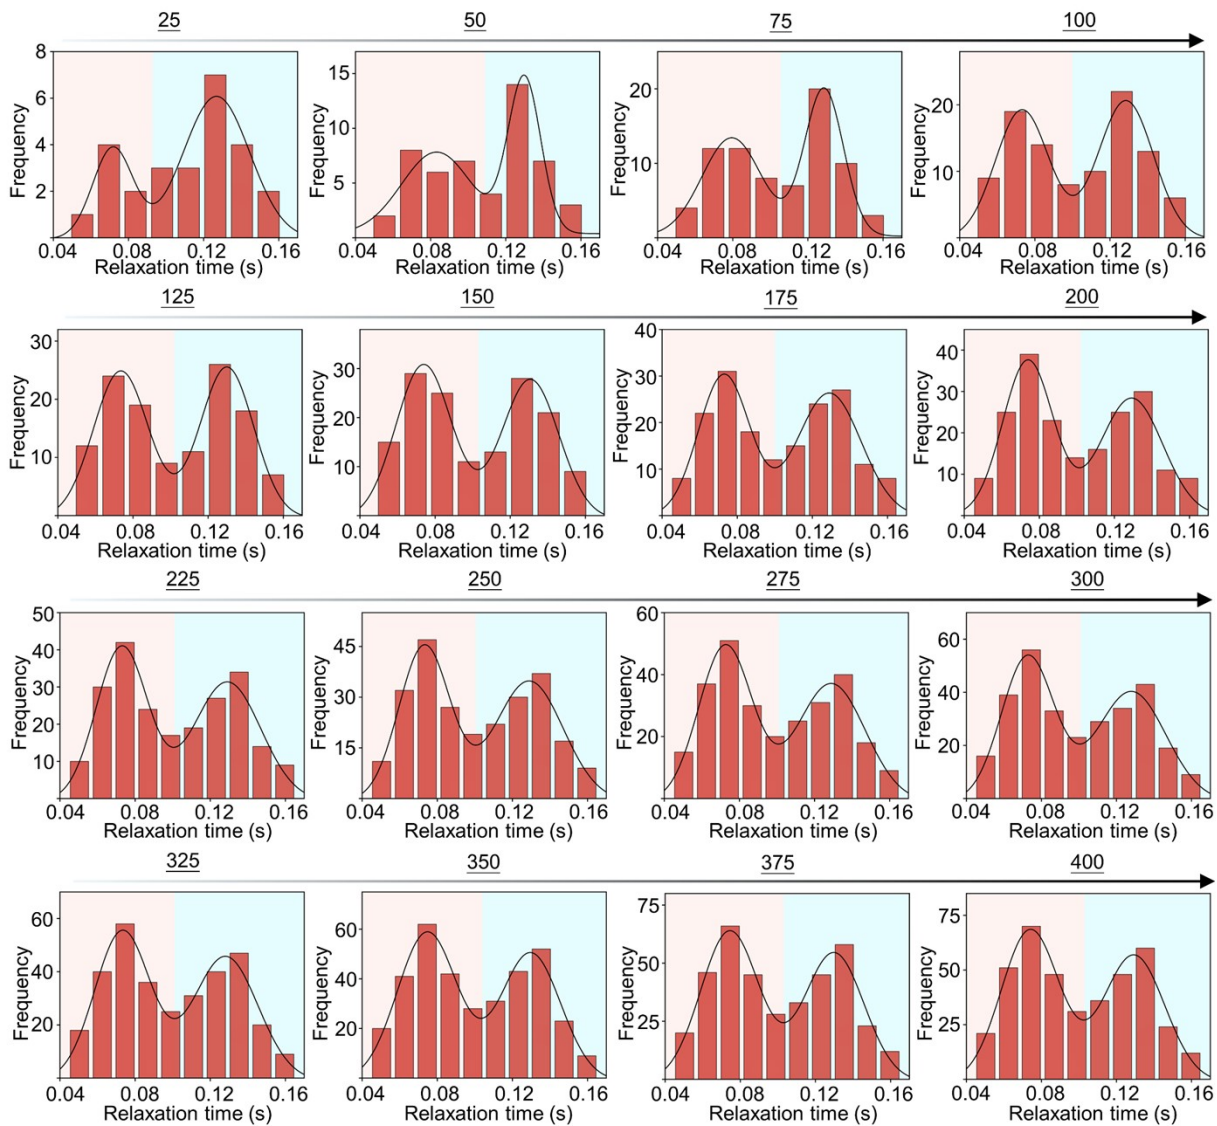

**Figure S3.** Relaxation time histogram for the number of datasets increased in order in a nanoslit with 130 nm.

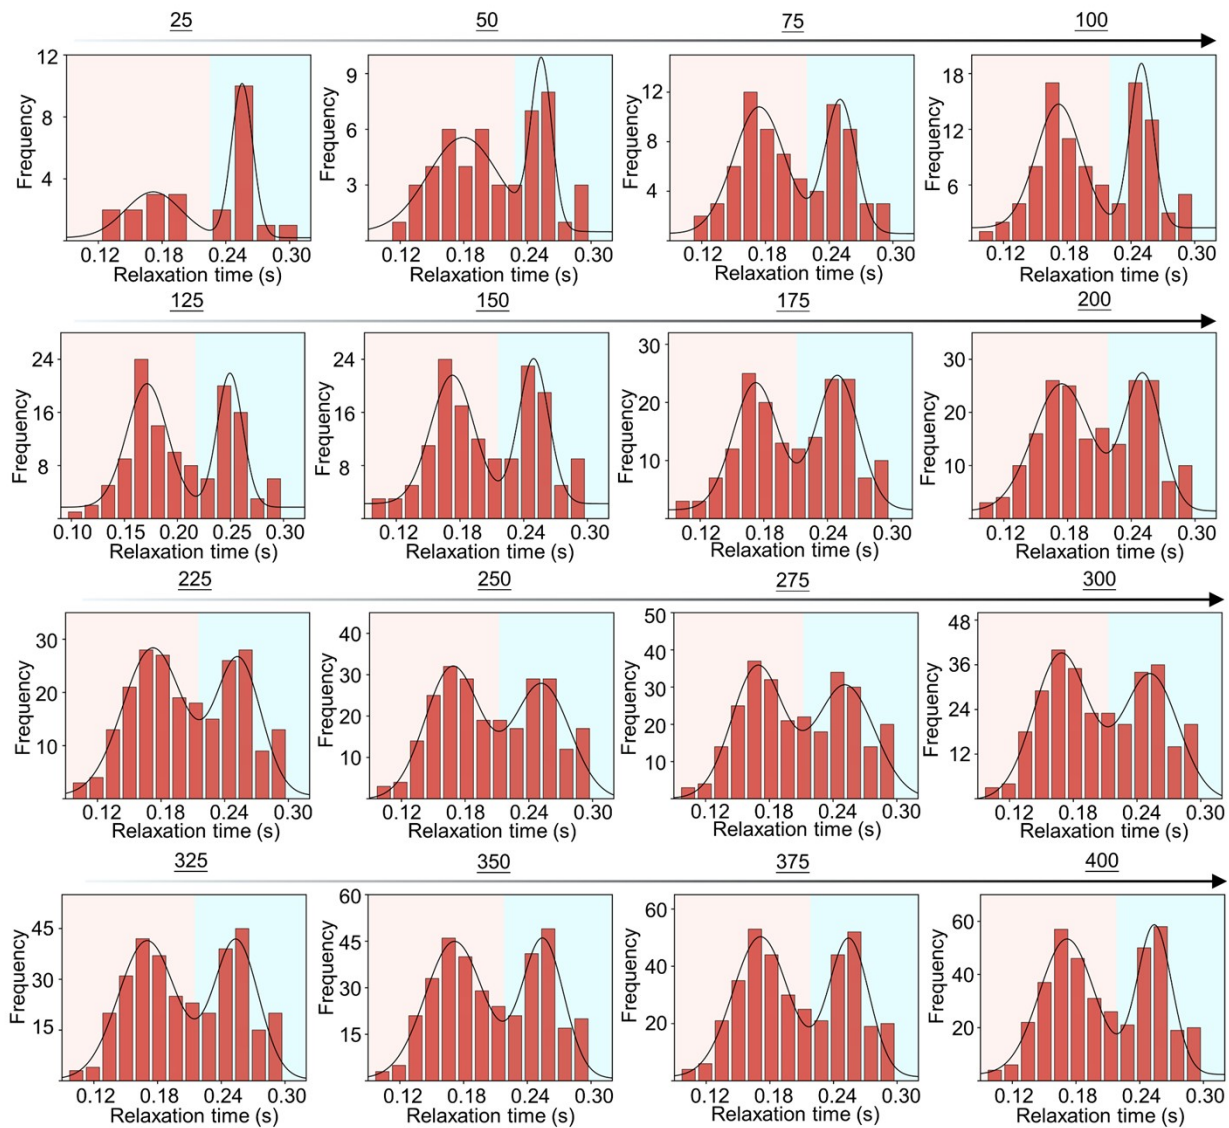

**Figure S4.** Relaxation time histogram for the number of datasets increased in order in a nanoslit with 110 nm.

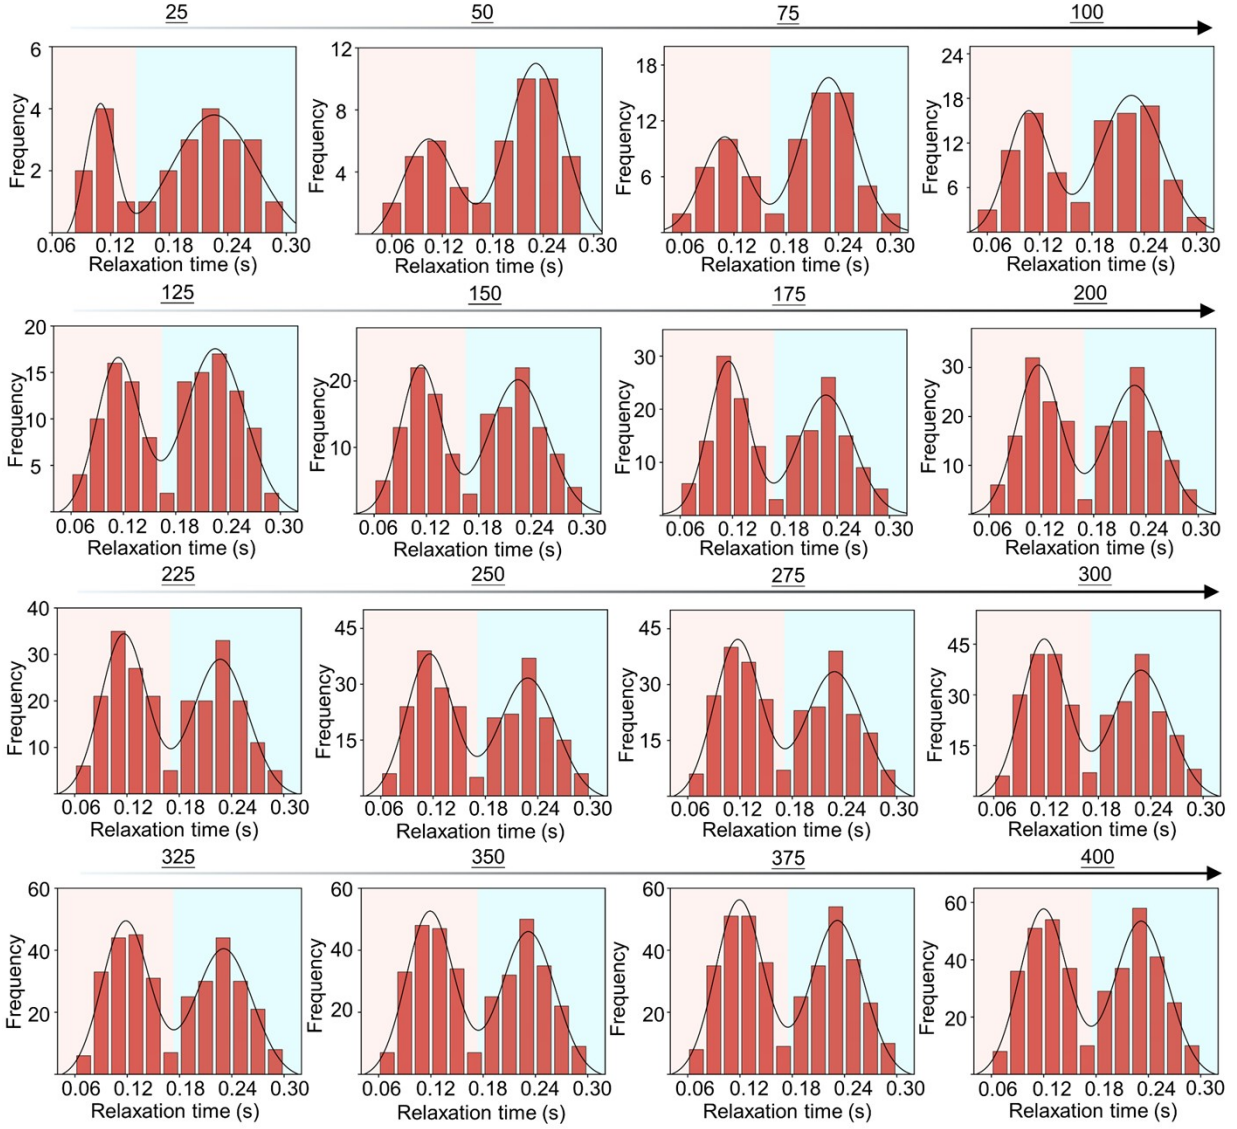

**Figure S5.** Relaxation time histogram for the number of datasets increased in order in a nanoslit with 69 nm.



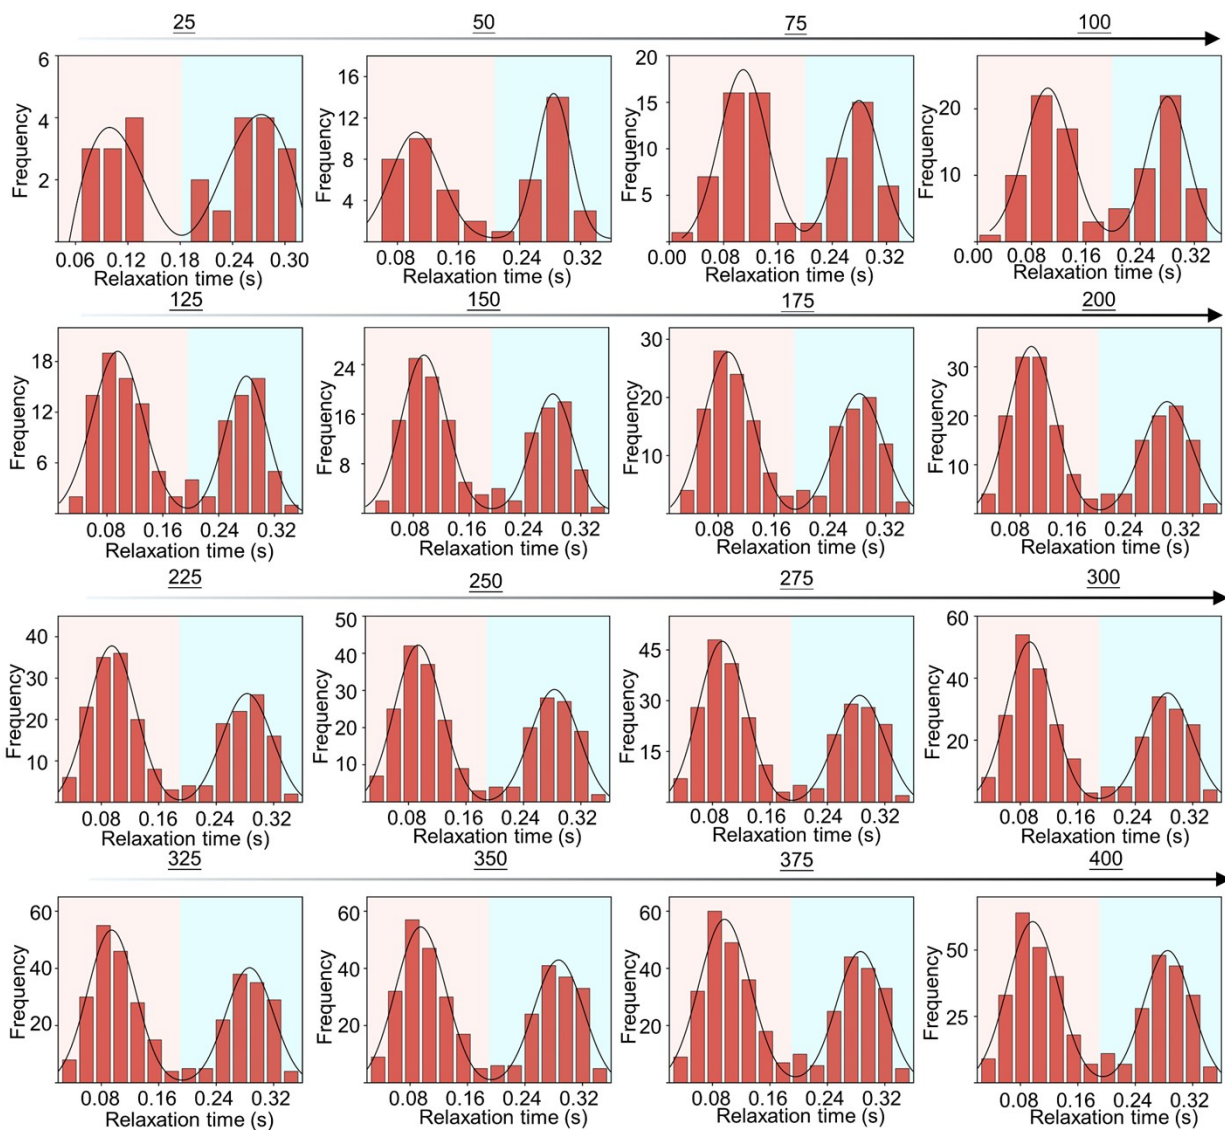

**Figure S6.** Relaxation time histogram for the number of datasets increased in order in a nanoslit with 49 nm.
